# Supplementary material
Source: publisher figshare collection journal article supplement (https://acs.figshare.com/ndownloader/files/3831346)
Supplement: Supplementary file 1 [file 3831346]

## Supporting Information

### **Effect of Polyelectrolyte Electron Collection Layer Counter Ion on the Properties of Polymer Solar Cells**

*Thu Trang Do,<sup>†</sup> Hee Seob Hong,<sup>†</sup> Ye Eun Ha,<sup>†</sup> Juyun Park,<sup>‡</sup> Yong-Cheol Kang,<sup>‡</sup> and Joo Hyun*

*Kim<sup>†\*</sup>*

<sup>†</sup>Department of Polymer Engineering, Pukyong National University, Busan 608-739, Korea

<sup>‡</sup>Department of Chemistry, Pukyong National University, Busan 608-737, Korea

#### **Corresponding Author**

\* jkim@pknu.ac.kr

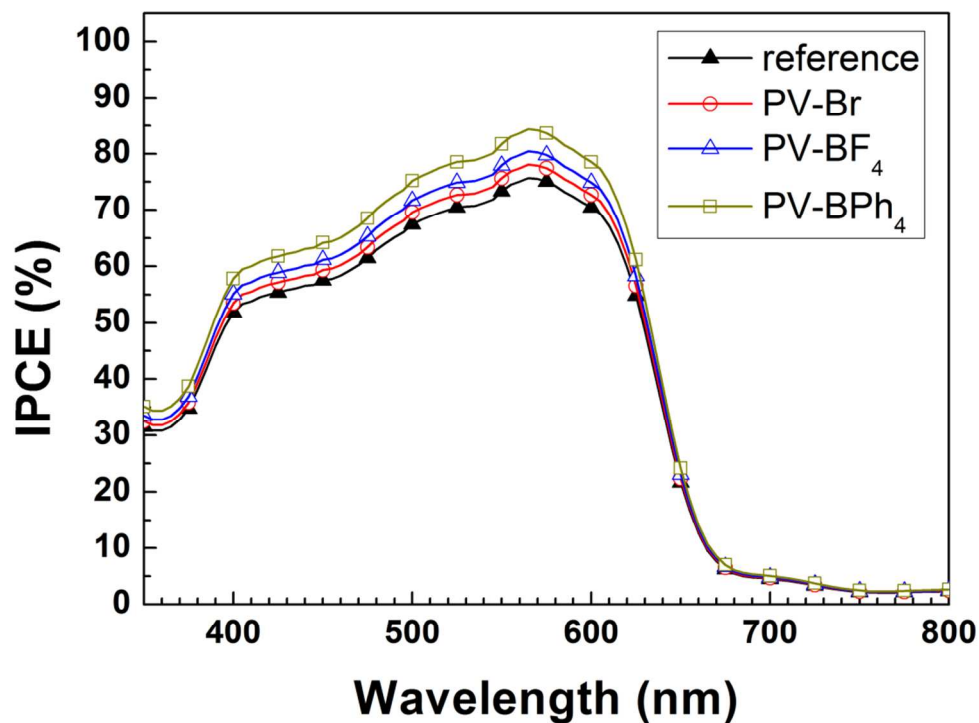

Figure S1. IPCE spectra of the device without PV (filled triangle), with PV-Br (open circle), with PV-BF<sub>4</sub> (open triangle), and with PV-BPh<sub>4</sub> (open square).
